# Supplementary material
Source: publisher figshare collection journal article supplement (https://acs.figshare.com/ndownloader/files/4261180)
Supplement: Supplementary file 1 [file 4261180]

# SUPPORTING INFORMATION

## Chemiluminescence and Chemiluminescence Resonance Energy Transfer (CRET) Aptamer Sensors Using Catalytic Hemin/G-Quadruplex

*Xiaoqing Liu<sup>†</sup>, Ronit Freeman<sup>†</sup>, Eyal Golub, and Itamar Willner\**

Institute of Chemistry, Center of Nanoscience and Nanotechnology, The Hebrew University of  
Jerusalem, Jerusalem 91904, Israel

E-mail: willnea@vms.huji.ac.il

Tel: +972-2-6585272

Fax: +972-2-6527715

<http://chem.ch.huji.ac.il/willner/>

<sup>†</sup> These authors contributed equally.

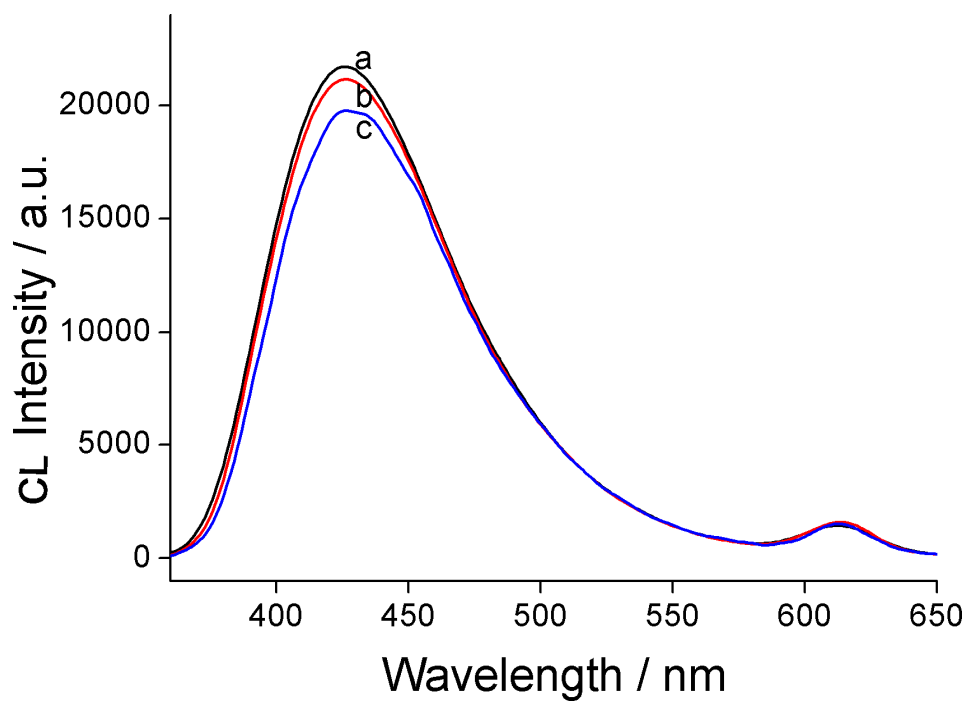

**Figure S1.** Luminescence spectrum corresponding to the CRET signal of the QDs modified with a foreign, non aptmeric G-quadruplex sequence, (7), in the absence of ATP, curve (a) and in the presence of different concentration of ATP: (b) 0.1 mM (c) 1 mM.

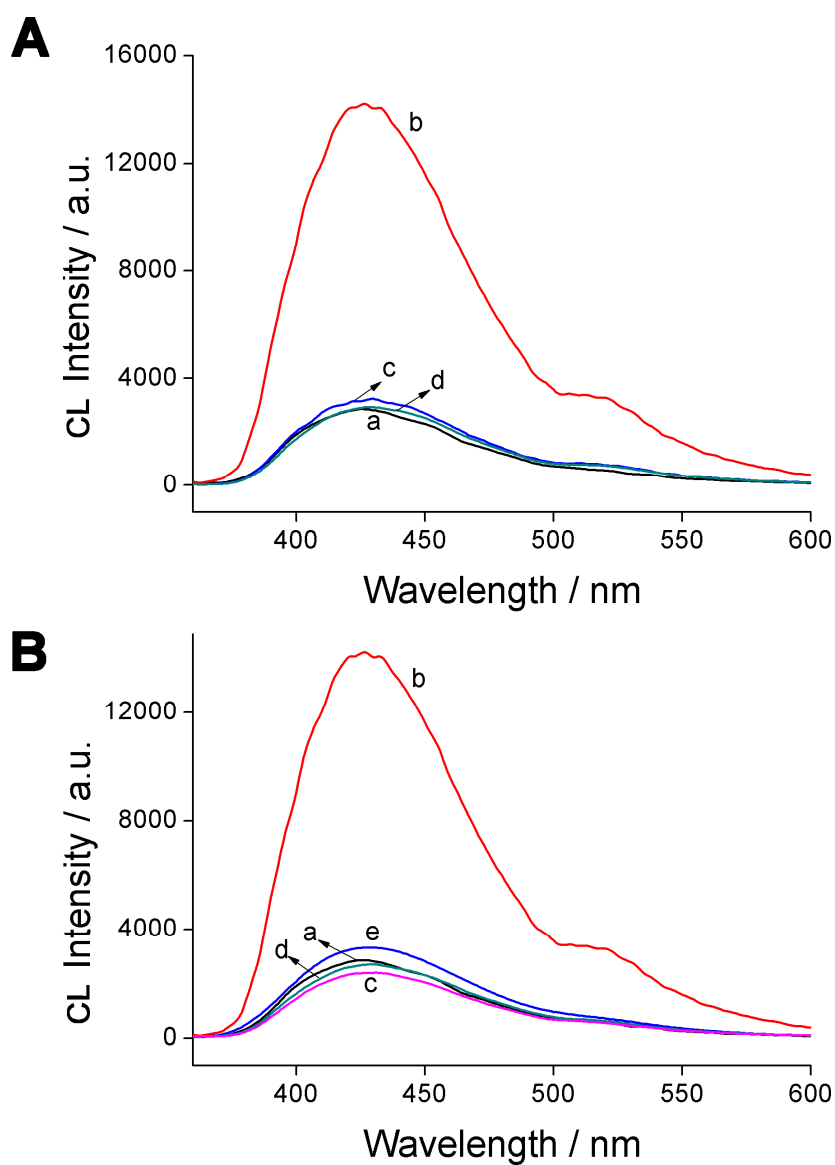

**Figure S2.** (A) Luminescence spectrum corresponding to the CRET signal of the Fluorescein dye in the absence of ATP, curve (a), and in the presence of (b) ATP, 0.8mM (c) AMP, 1mM (d) ADP, 1mM. (B) Luminescence spectrum corresponding to the CRET signal of the Fluorescein dye in the absence of ATP, curve (a), and in the presence of (b) ATP, 1mM (c) UTP, 1mM (d) GTP, 1mM (e) CTP, 1mM.
